# Supplementary material for: CRlncRC: a machine learning-based method for cancer-related long noncoding RNA identification using integrated features
Source: BMC Med Genomics. 2018 Dec 31;11(Suppl 6):120. doi: 10.1186/s12920-018-0436-9 (PMC6311943; doi:10.1186/s12920-018-0436-9)
Supplement: Supplementary file 2 — Negative lncRNA dataset. (XLSX 64 kb) [file 12920_2018_436_MOESM2_ESM.xlsx]

## Sheet: Sheet1
ENSG00000115934
ENSG00000122043
ENSG00000124915
ENSG00000129816
ENSG00000129845
ENSG00000131484
ENSG00000131538
ENSG00000136315
ENSG00000147753
ENSG00000147761
ENSG00000149656
ENSG00000163364
ENSG00000170161
ENSG00000170590
ENSG00000170846
ENSG00000175772
ENSG00000176075
ENSG00000176754
ENSG00000177757
ENSG00000177788
ENSG00000178107
ENSG00000178130
ENSG00000178440
ENSG00000178457
ENSG00000179136
ENSG00000179219
ENSG00000179406
ENSG00000179452
ENSG00000179523
ENSG00000179676
ENSG00000179935
ENSG00000180712
ENSG00000180910
ENSG00000182366
ENSG00000182586
ENSG00000182648
ENSG00000183385
ENSG00000184274
ENSG00000184856
ENSG00000184991
ENSG00000185168
ENSG00000185186
ENSG00000185433
ENSG00000185700
ENSG00000185904
ENSG00000188660
ENSG00000188825
ENSG00000189238
ENSG00000189419
ENSG00000197176
ENSG00000197210
ENSG00000197291
ENSG00000197332
ENSG00000197462
ENSG00000197503
ENSG00000197813
ENSG00000198106
ENSG00000198221
ENSG00000198547
ENSG00000203279
ENSG00000203356
ENSG00000203364
ENSG00000203402
ENSG00000203434
ENSG00000203498
ENSG00000203565
ENSG00000203585
ENSG00000203605
ENSG00000203635
ENSG00000203645
ENSG00000203650
ENSG00000203688
ENSG00000203729
ENSG00000203801
ENSG00000203971
ENSG00000203999
ENSG00000204117
ENSG00000204187
ENSG00000204241
ENSG00000204250
ENSG00000204362
ENSG00000204588
ENSG00000204603
ENSG00000204684
ENSG00000204792
ENSG00000204802
ENSG00000204990
ENSG00000205037
ENSG00000205293
ENSG00000205325
ENSG00000205444
ENSG00000205452
ENSG00000205562
ENSG00000205611
ENSG00000205628
ENSG00000205632
ENSG00000205634
ENSG00000205636
ENSG00000205653
ENSG00000205662
ENSG00000205663
ENSG00000205682
ENSG00000205786
ENSG00000205837
ENSG00000205866
ENSG00000206062
ENSG00000206142
ENSG00000206567
ENSG00000207955
ENSG00000212663
ENSG00000212855
ENSG00000212856
ENSG00000212930
ENSG00000212939
ENSG00000213279
ENSG00000213468
ENSG00000213863
ENSG00000214039
ENSG00000214043
ENSG00000214145
ENSG00000214381
ENSG00000214614
ENSG00000214797
ENSG00000214803
ENSG00000214915
ENSG00000214942
ENSG00000215112
ENSG00000215117
ENSG00000215162
ENSG00000215231
ENSG00000215241
ENSG00000215560
ENSG00000215808
ENSG00000215859
ENSG00000215866
ENSG00000215881
ENSG00000218510
ENSG00000218839
ENSG00000219159
ENSG00000219445
ENSG00000219926
ENSG00000220161
ENSG00000220908
ENSG00000221571
ENSG00000222032
ENSG00000223344
ENSG00000223351
ENSG00000223360
ENSG00000223373
ENSG00000223379
ENSG00000223381
ENSG00000223387
ENSG00000223396
ENSG00000223400
ENSG00000223404
ENSG00000223410
ENSG00000223430
ENSG00000223432
ENSG00000223438
ENSG00000223466
ENSG00000223470
ENSG00000223473
ENSG00000223479
ENSG00000223486
ENSG00000223504
ENSG00000223511
ENSG00000223517
ENSG00000223536
ENSG00000223546
ENSG00000223554
ENSG00000223561
ENSG00000223562
ENSG00000223581
ENSG00000223587
ENSG00000223617
ENSG00000223623
ENSG00000223626
ENSG00000223631
ENSG00000223633
ENSG00000223641
ENSG00000223643
ENSG00000223646
ENSG00000223647
ENSG00000223695
ENSG00000223714
ENSG00000223715
ENSG00000223716
ENSG00000223720
ENSG00000223726
ENSG00000223729
ENSG00000223732
ENSG00000223742
ENSG00000223751
ENSG00000223761
ENSG00000223764
ENSG00000223765
ENSG00000223768
ENSG00000223795
ENSG00000223800
ENSG00000223806
ENSG00000223809
ENSG00000223811
ENSG00000223812
ENSG00000223826
ENSG00000223834
ENSG00000223839
ENSG00000223842
ENSG00000223855
ENSG00000223859
ENSG00000223863
ENSG00000223870
ENSG00000223880
ENSG00000223881
ENSG00000223906
ENSG00000223914
ENSG00000223930
ENSG00000223944
ENSG00000223956
ENSG00000223975
ENSG00000223979
ENSG00000223985
ENSG00000223993
ENSG00000223999
ENSG00000224000
ENSG00000224008
ENSG00000224015
ENSG00000224017
ENSG00000224018
ENSG00000224023
ENSG00000224027
ENSG00000224028
ENSG00000224034
ENSG00000224038
ENSG00000224048
ENSG00000224049
ENSG00000224050
ENSG00000224074
ENSG00000224075
ENSG00000224099
ENSG00000224137
ENSG00000224167
ENSG00000224173
ENSG00000224174
ENSG00000224177
ENSG00000224190
ENSG00000224231
ENSG00000224243
ENSG00000224247
ENSG00000224267
ENSG00000224286
ENSG00000224294
ENSG00000224307
ENSG00000224322
ENSG00000224375
ENSG00000224382
ENSG00000224397
ENSG00000224400
ENSG00000224413
ENSG00000224460
ENSG00000224478
ENSG00000224481
ENSG00000224504
ENSG00000224511
ENSG00000224535
ENSG00000224559
ENSG00000224565
ENSG00000224568
ENSG00000224577
ENSG00000224583
ENSG00000224592
ENSG00000224605
ENSG00000224610
ENSG00000224612
ENSG00000224626
ENSG00000224635
ENSG00000224652
ENSG00000224655
ENSG00000224687
ENSG00000224698
ENSG00000224711
ENSG00000224714
ENSG00000224717
ENSG00000224718
ENSG00000224739
ENSG00000224750
ENSG00000224758
ENSG00000224788
ENSG00000224795
ENSG00000224810
ENSG00000224817
ENSG00000224819
ENSG00000224832
ENSG00000224844
ENSG00000224848
ENSG00000224850
ENSG00000224857
ENSG00000224865
ENSG00000224893
ENSG00000224899
ENSG00000224910
ENSG00000224914
ENSG00000224918
ENSG00000224922
ENSG00000224924
ENSG00000224932
ENSG00000224933
ENSG00000224934
ENSG00000224939
ENSG00000224944
ENSG00000224959
ENSG00000224961
ENSG00000224968
ENSG00000224977
ENSG00000224989
ENSG00000225002
ENSG00000225006
ENSG00000225007
ENSG00000225012
ENSG00000225028
ENSG00000225039
ENSG00000225050
ENSG00000225064
ENSG00000225077
ENSG00000225085
ENSG00000225096
ENSG00000225105
ENSG00000225107
ENSG00000225129
ENSG00000225148
ENSG00000225152
ENSG00000225163
ENSG00000225166
ENSG00000225172
ENSG00000225173
ENSG00000225174
ENSG00000225194
ENSG00000225208
ENSG00000225209
ENSG00000225218
ENSG00000225226
ENSG00000225231
ENSG00000225233
ENSG00000225249
ENSG00000225255
ENSG00000225285
ENSG00000225298
ENSG00000225316
ENSG00000225325
ENSG00000225331
ENSG00000225337
ENSG00000225359
ENSG00000225383
ENSG00000225386
ENSG00000225387
ENSG00000225391
ENSG00000225411
ENSG00000225413
ENSG00000225424
ENSG00000225431
ENSG00000225434
ENSG00000225446
ENSG00000225470
ENSG00000225488
ENSG00000225489
ENSG00000225493
ENSG00000225498
ENSG00000225506
ENSG00000225518
ENSG00000225519
ENSG00000225520
ENSG00000225532
ENSG00000225535
ENSG00000225537
ENSG00000225545
ENSG00000225546
ENSG00000225548
ENSG00000225554
ENSG00000225561
ENSG00000225563
ENSG00000225570
ENSG00000225579
ENSG00000225582
ENSG00000225588
ENSG00000225595
ENSG00000225612
ENSG00000225620
ENSG00000225626
ENSG00000225640
ENSG00000225643
ENSG00000225647
ENSG00000225655
ENSG00000225657
ENSG00000225675
ENSG00000225684
ENSG00000225689
ENSG00000225706
ENSG00000225725
ENSG00000225742
ENSG00000225750
ENSG00000225759
ENSG00000225765
ENSG00000225768
ENSG00000225775
ENSG00000225785
ENSG00000225790
ENSG00000225791
ENSG00000225793
ENSG00000225815
ENSG00000225818
ENSG00000225826
ENSG00000225836
ENSG00000225857
ENSG00000225860
ENSG00000225870
ENSG00000225877
ENSG00000225879
ENSG00000225882
ENSG00000225916
ENSG00000225919
ENSG00000225930
ENSG00000225942
ENSG00000225948
ENSG00000225960
ENSG00000225975
ENSG00000225982
ENSG00000226005
ENSG00000226007
ENSG00000226012
ENSG00000226029
ENSG00000226037
ENSG00000226041
ENSG00000226047
ENSG00000226067
ENSG00000226078
ENSG00000226079
ENSG00000226087
ENSG00000226091
ENSG00000226097
ENSG00000226115
ENSG00000226125
ENSG00000226140
ENSG00000226172
ENSG00000226194
ENSG00000226203
ENSG00000226204
ENSG00000226206
ENSG00000226207
ENSG00000226208
ENSG00000226218
ENSG00000226238
ENSG00000226249
ENSG00000226250
ENSG00000226266
ENSG00000226276
ENSG00000226277
ENSG00000226281
ENSG00000226296
ENSG00000226302
ENSG00000226328
ENSG00000226355
ENSG00000226362
ENSG00000226370
ENSG00000226374
ENSG00000226375
ENSG00000226412
ENSG00000226423
ENSG00000226426
ENSG00000226434
ENSG00000226442
ENSG00000226453
ENSG00000226486
ENSG00000226487
ENSG00000226488
ENSG00000226508
ENSG00000226516
ENSG00000226527
ENSG00000226542
ENSG00000226548
ENSG00000226562
ENSG00000226566
ENSG00000226578
ENSG00000226581
ENSG00000226587
ENSG00000226594
ENSG00000226599
ENSG00000226601
ENSG00000226643
ENSG00000226649
ENSG00000226669
ENSG00000226673
ENSG00000226676
ENSG00000226680
ENSG00000226694
ENSG00000226707
ENSG00000226708
ENSG00000226715
ENSG00000226717
ENSG00000226722
ENSG00000226739
ENSG00000226741
ENSG00000226751
ENSG00000226756
ENSG00000226770
ENSG00000226782
ENSG00000226798
ENSG00000226808
ENSG00000226813
ENSG00000226816
ENSG00000226825
ENSG00000226853
ENSG00000226854
ENSG00000226859
ENSG00000226861
ENSG00000226868
ENSG00000226900
ENSG00000226903
ENSG00000226906
ENSG00000226913
ENSG00000226921
ENSG00000226927
ENSG00000226935
ENSG00000226938
ENSG00000226939
ENSG00000226954
ENSG00000226956
ENSG00000226965
ENSG00000226968
ENSG00000226983
ENSG00000226985
ENSG00000226995
ENSG00000226996
ENSG00000227007
ENSG00000227012
ENSG00000227016
ENSG00000227017
ENSG00000227021
ENSG00000227029
ENSG00000227047
ENSG00000227066
ENSG00000227071
ENSG00000227075
ENSG00000227078
ENSG00000227088
ENSG00000227089
ENSG00000227090
ENSG00000227098
ENSG00000227101
ENSG00000227107
ENSG00000227121
ENSG00000227125
ENSG00000227131
ENSG00000227139
ENSG00000227148
ENSG00000227157
ENSG00000227167
ENSG00000227181
ENSG00000227193
ENSG00000227240
ENSG00000227260
ENSG00000227269
ENSG00000227282
ENSG00000227290
ENSG00000227292
ENSG00000227293
ENSG00000227297
ENSG00000227301
ENSG00000227305
ENSG00000227306
ENSG00000227308
ENSG00000227313
ENSG00000227336
ENSG00000227338
ENSG00000227356
ENSG00000227359
ENSG00000227360
ENSG00000227363
ENSG00000227386
ENSG00000227421
ENSG00000227439
ENSG00000227455
ENSG00000227459
ENSG00000227468
ENSG00000227475
ENSG00000227477
ENSG00000227479
ENSG00000227482
ENSG00000227486
ENSG00000227489
ENSG00000227498
ENSG00000227502
ENSG00000227516
ENSG00000227544
ENSG00000227549
ENSG00000227555
ENSG00000227564
ENSG00000227588
ENSG00000227606
ENSG00000227611
ENSG00000227640
ENSG00000227674
ENSG00000227676
ENSG00000227680
ENSG00000227681
ENSG00000227683
ENSG00000227685
ENSG00000227706
ENSG00000227708
ENSG00000227713
ENSG00000227716
ENSG00000227718
ENSG00000227723
ENSG00000227733
ENSG00000227740
ENSG00000227748
ENSG00000227764
ENSG00000227809
ENSG00000227824
ENSG00000227851
ENSG00000227863
ENSG00000227869
ENSG00000227880
ENSG00000227885
ENSG00000227888
ENSG00000227893
ENSG00000227895
ENSG00000227902
ENSG00000227911
ENSG00000227912
ENSG00000227917
ENSG00000227925
ENSG00000227930
ENSG00000227935
ENSG00000227940
ENSG00000227946
ENSG00000227947
ENSG00000227958
ENSG00000227981
ENSG00000228031
ENSG00000228048
ENSG00000228055
ENSG00000228058
ENSG00000228065
ENSG00000228079
ENSG00000228100
ENSG00000228105
ENSG00000228106
ENSG00000228127
ENSG00000228136
ENSG00000228139
ENSG00000228140
ENSG00000228153
ENSG00000228162
ENSG00000228173
ENSG00000228216
ENSG00000228226
ENSG00000228229
ENSG00000228235
ENSG00000228239
ENSG00000228240
ENSG00000228251
ENSG00000228261
ENSG00000228262
ENSG00000228271
ENSG00000228272
ENSG00000228277
ENSG00000228295
ENSG00000228296
ENSG00000228308
ENSG00000228338
ENSG00000228358
ENSG00000228361
ENSG00000228365
ENSG00000228372
ENSG00000228379
ENSG00000228386
ENSG00000228391
ENSG00000228392
ENSG00000228397
ENSG00000228408
ENSG00000228421
ENSG00000228422
ENSG00000228423
ENSG00000228426
ENSG00000228463
ENSG00000228467
ENSG00000228482
ENSG00000228484
ENSG00000228495
ENSG00000228503
ENSG00000228504
ENSG00000228505
ENSG00000228521
ENSG00000228526
ENSG00000228527
ENSG00000228528
ENSG00000228536
ENSG00000228538
ENSG00000228541
ENSG00000228549
ENSG00000228559
ENSG00000228561
ENSG00000228569
ENSG00000228573
ENSG00000228586
ENSG00000228587
ENSG00000228592
ENSG00000228616
ENSG00000228618
ENSG00000228622
ENSG00000228627
ENSG00000228634
ENSG00000228636
ENSG00000228639
ENSG00000228648
ENSG00000228650
ENSG00000228658
ENSG00000228683
ENSG00000228692
ENSG00000228697
ENSG00000228704
ENSG00000228707
ENSG00000228714
ENSG00000228718
ENSG00000228719
ENSG00000228730
ENSG00000228734
ENSG00000228735
ENSG00000228750
ENSG00000228777
ENSG00000228784
ENSG00000228786
ENSG00000228792
ENSG00000228793
ENSG00000228798
ENSG00000228799
ENSG00000228817
ENSG00000228824
ENSG00000228826
ENSG00000228857
ENSG00000228862
ENSG00000228878
ENSG00000228886
ENSG00000228889
ENSG00000228890
ENSG00000228906
ENSG00000228909
ENSG00000228933
ENSG00000228950
ENSG00000228952
ENSG00000228959
ENSG00000228961
ENSG00000228968
ENSG00000228999
ENSG00000229011
ENSG00000229012
ENSG00000229051
ENSG00000229118
ENSG00000229131
ENSG00000229155
ENSG00000229160
ENSG00000229175
ENSG00000229177
ENSG00000229178
ENSG00000229180
ENSG00000229195
ENSG00000229201
ENSG00000229205
ENSG00000229206
ENSG00000229214
ENSG00000229225
ENSG00000229227
ENSG00000229236
ENSG00000229243
ENSG00000229246
ENSG00000229249
ENSG00000229255
ENSG00000229269
ENSG00000229271
ENSG00000229275
ENSG00000229282
ENSG00000229289
ENSG00000229297
ENSG00000229301
ENSG00000229306
ENSG00000229307
ENSG00000229308
ENSG00000229309
ENSG00000229311
ENSG00000229321
ENSG00000229352
ENSG00000229379
ENSG00000229382
ENSG00000229388
ENSG00000229395
ENSG00000229404
ENSG00000229424
ENSG00000229433
ENSG00000229434
ENSG00000229437
ENSG00000229443
ENSG00000229454
ENSG00000229457
ENSG00000229459
ENSG00000229466
ENSG00000229484
ENSG00000229494
ENSG00000229495
ENSG00000229522
ENSG00000229536
ENSG00000229543
ENSG00000229546
ENSG00000229550
ENSG00000229557
ENSG00000229563
ENSG00000229565
ENSG00000229569
ENSG00000229578
ENSG00000229588
ENSG00000229599
ENSG00000229600
ENSG00000229606
ENSG00000229607
ENSG00000229609
ENSG00000229611
ENSG00000229613
ENSG00000229625
ENSG00000229628
ENSG00000229630
ENSG00000229639
ENSG00000229642
ENSG00000229643
ENSG00000229647
ENSG00000229649
ENSG00000229654
ENSG00000229660
ENSG00000229671
ENSG00000229697
ENSG00000229699
ENSG00000229719
ENSG00000229722
ENSG00000229740
ENSG00000229755
ENSG00000229774
ENSG00000229775
ENSG00000229779
ENSG00000229788
ENSG00000229791
ENSG00000229792
ENSG00000229805
ENSG00000229881
ENSG00000229891
ENSG00000229896
ENSG00000229912
ENSG00000229923
ENSG00000229943
ENSG00000229957
ENSG00000229961
ENSG00000229962
ENSG00000229964
ENSG00000229976
ENSG00000229983
ENSG00000229986
ENSG00000229989
ENSG00000230010
ENSG00000230021
ENSG00000230024
ENSG00000230027
ENSG00000230030
ENSG00000230040
ENSG00000230051
ENSG00000230096
ENSG00000230100
ENSG00000230105
ENSG00000230107
ENSG00000230109
ENSG00000230120
ENSG00000230133
ENSG00000230138
ENSG00000230142
ENSG00000230153
ENSG00000230156
ENSG00000230159
ENSG00000230173
ENSG00000230197
ENSG00000230205
ENSG00000230229
ENSG00000230233
ENSG00000230234
ENSG00000230239
ENSG00000230248
ENSG00000230250
ENSG00000230269
ENSG00000230285
ENSG00000230294
ENSG00000230298
ENSG00000230309
ENSG00000230310
ENSG00000230317
ENSG00000230352
ENSG00000230365
ENSG00000230366
ENSG00000230368
ENSG00000230372
ENSG00000230379
ENSG00000230381
ENSG00000230387
ENSG00000230392
ENSG00000230394
ENSG00000230401
ENSG00000230402
ENSG00000230403
ENSG00000230404
ENSG00000230415
ENSG00000230423
ENSG00000230426
ENSG00000230434
ENSG00000230438
ENSG00000230440
ENSG00000230471
ENSG00000230487
ENSG00000230515
ENSG00000230516
ENSG00000230523
ENSG00000230525
ENSG00000230526
ENSG00000230537
ENSG00000230542
ENSG00000230552
ENSG00000230555
ENSG00000230563
ENSG00000230569
ENSG00000230573
ENSG00000230597
ENSG00000230600
ENSG00000230606
ENSG00000230615
ENSG00000230623
ENSG00000230627
ENSG00000230631
ENSG00000230649
ENSG00000230651
ENSG00000230658
ENSG00000230663
ENSG00000230668
ENSG00000230676
ENSG00000230680
ENSG00000230687
ENSG00000230690
ENSG00000230699
ENSG00000230704
ENSG00000230710
ENSG00000230714
ENSG00000230720
ENSG00000230725
ENSG00000230746
ENSG00000230759
ENSG00000230768
ENSG00000230794
ENSG00000230803
ENSG00000230834
ENSG00000230836
ENSG00000230838
ENSG00000230839
ENSG00000230843
ENSG00000230844
ENSG00000230846
ENSG00000230852
ENSG00000230864
ENSG00000230866
ENSG00000230920
ENSG00000230923
ENSG00000230939
ENSG00000230941
ENSG00000230943
ENSG00000230944
ENSG00000230945
ENSG00000230962
ENSG00000230967
ENSG00000230968
ENSG00000230969
ENSG00000230972
ENSG00000230975
ENSG00000231010
ENSG00000231015
ENSG00000231019
ENSG00000231023
ENSG00000231024
ENSG00000231039
ENSG00000231040
ENSG00000231054
ENSG00000231056
ENSG00000231081
ENSG00000231082
ENSG00000231090
ENSG00000231106
ENSG00000231110
ENSG00000231114
ENSG00000231133
ENSG00000231140
ENSG00000231141
ENSG00000231143
ENSG00000231149
ENSG00000231156
ENSG00000231173
ENSG00000231175
ENSG00000231178
ENSG00000231189
ENSG00000231193
ENSG00000231212
ENSG00000231217
ENSG00000231221
ENSG00000231231
ENSG00000231238
ENSG00000231248
ENSG00000231253
ENSG00000231291
ENSG00000231326
ENSG00000231327
ENSG00000231346
ENSG00000231358
ENSG00000231364
ENSG00000231394
ENSG00000231401
ENSG00000231403
ENSG00000231405
ENSG00000231412
ENSG00000231418
ENSG00000231420
ENSG00000231426
ENSG00000231427
ENSG00000231428
ENSG00000231429
ENSG00000231435
ENSG00000231439
ENSG00000231453
ENSG00000231460
ENSG00000231476
ENSG00000231477
ENSG00000231482
ENSG00000231483
ENSG00000231487
ENSG00000231492
ENSG00000231495
ENSG00000231505
ENSG00000231509
ENSG00000231510
ENSG00000231512
ENSG00000231528
ENSG00000231532
ENSG00000231533
ENSG00000231535
ENSG00000231539
ENSG00000231551
ENSG00000231560
ENSG00000231566
ENSG00000231589
ENSG00000231601
ENSG00000231604
ENSG00000231606
ENSG00000231620
ENSG00000231626
ENSG00000231630
ENSG00000231648
ENSG00000231662
ENSG00000231666
ENSG00000231671
ENSG00000231674
ENSG00000231680
ENSG00000231682
ENSG00000231704
ENSG00000231705
ENSG00000231713
ENSG00000231714
ENSG00000231720
ENSG00000231742
ENSG00000231754
ENSG00000231755
ENSG00000231772
ENSG00000231782
ENSG00000231791
ENSG00000231808
ENSG00000231811
ENSG00000231814
ENSG00000231815
ENSG00000231817
ENSG00000231826
ENSG00000231829
ENSG00000231838
ENSG00000231842
ENSG00000231846
ENSG00000231876
ENSG00000231881
ENSG00000231883
ENSG00000231892
ENSG00000231902
ENSG00000231912
ENSG00000231914
ENSG00000231943
ENSG00000231949
ENSG00000231966
ENSG00000231977
ENSG00000231983
ENSG00000231986
ENSG00000231990
ENSG00000232001
ENSG00000232019
ENSG00000232028
ENSG00000232035
ENSG00000232058
ENSG00000232063
ENSG00000232077
ENSG00000232098
ENSG00000232100
ENSG00000232117
ENSG00000232118
ENSG00000232130
ENSG00000232139
ENSG00000232153
ENSG00000232164
ENSG00000232170
ENSG00000232188
ENSG00000232190
ENSG00000232193
ENSG00000232200
ENSG00000232211
ENSG00000232212
ENSG00000232225
ENSG00000232227
ENSG00000232234
ENSG00000232243
ENSG00000232245
ENSG00000232265
ENSG00000232286
ENSG00000232294
ENSG00000232299
ENSG00000232300
ENSG00000232309
ENSG00000232316
ENSG00000232324
ENSG00000232328
ENSG00000232347
ENSG00000232348
ENSG00000232353
ENSG00000232386
ENSG00000232395
ENSG00000232411
ENSG00000232412
ENSG00000232416
ENSG00000232419
ENSG00000232436
ENSG00000232444
ENSG00000232448
ENSG00000232453
ENSG00000232458
ENSG00000232465
ENSG00000232470
ENSG00000232494
ENSG00000232500
ENSG00000232512
ENSG00000232527
ENSG00000232529
ENSG00000232539
ENSG00000232548
ENSG00000232555
ENSG00000232591
ENSG00000232593
ENSG00000232596
ENSG00000232597
ENSG00000232598
ENSG00000232604
ENSG00000232606
ENSG00000232611
ENSG00000232618
ENSG00000232636
ENSG00000232643
ENSG00000232645
ENSG00000232655
ENSG00000232677
ENSG00000232680
ENSG00000232698
ENSG00000232719
ENSG00000232721
ENSG00000232740
ENSG00000232749
ENSG00000232806
ENSG00000232812
ENSG00000232817
ENSG00000232827
ENSG00000232835
ENSG00000232837
ENSG00000232849
ENSG00000232855
ENSG00000232884
ENSG00000232886
ENSG00000232895
ENSG00000232896
ENSG00000232903
ENSG00000232947
ENSG00000232954
ENSG00000232964
ENSG00000232985
ENSG00000233013
ENSG00000233047
ENSG00000233064
ENSG00000233077
ENSG00000233079
ENSG00000233081
ENSG00000233082
ENSG00000233085
ENSG00000233086
ENSG00000233096
ENSG00000233103
ENSG00000233123
ENSG00000233124
ENSG00000233128
ENSG00000233145
ENSG00000233154
ENSG00000233179
ENSG00000233193
ENSG00000233200
ENSG00000233208
ENSG00000233214
ENSG00000233215
ENSG00000233219
ENSG00000233220
ENSG00000233234
ENSG00000233236
ENSG00000233258
ENSG00000233277
ENSG00000233288
ENSG00000233290
ENSG00000233304
ENSG00000233336
ENSG00000233349
ENSG00000233365
ENSG00000233372
ENSG00000233379
ENSG00000233395
ENSG00000233396
ENSG00000233399
ENSG00000233403
ENSG00000233410
ENSG00000233415
ENSG00000233417
ENSG00000233420
ENSG00000233421
ENSG00000233423
ENSG00000233424
ENSG00000233470
ENSG00000233479
ENSG00000233480
ENSG00000233492
ENSG00000233508
ENSG00000233515
ENSG00000233516
ENSG00000233521
ENSG00000233522
ENSG00000233528
ENSG00000233532
ENSG00000233534
ENSG00000233535
ENSG00000233536
ENSG00000233569
ENSG00000233570
ENSG00000233571
ENSG00000233574
ENSG00000233577
ENSG00000233605
ENSG00000233607
ENSG00000233625
ENSG00000233633
ENSG00000233651
ENSG00000233656
ENSG00000233689
ENSG00000233694
ENSG00000233699
ENSG00000233714
ENSG00000233721
ENSG00000233730
ENSG00000233754
ENSG00000233775
ENSG00000233817
ENSG00000233821
ENSG00000233824
ENSG00000233835
ENSG00000233852
ENSG00000233858
ENSG00000233864
ENSG00000233866
ENSG00000233878
ENSG00000233882
ENSG00000233895
ENSG00000233901
ENSG00000233906
ENSG00000233907
ENSG00000233919
ENSG00000233922
ENSG00000233936
ENSG00000233942
ENSG00000233960
ENSG00000233967
ENSG00000233969
ENSG00000233975
ENSG00000233977
ENSG00000233978
ENSG00000233981
ENSG00000233985
ENSG00000233987
ENSG00000234015
ENSG00000234019
ENSG00000234021
ENSG00000234034
ENSG00000234052
ENSG00000234056
ENSG00000234076
ENSG00000234083
ENSG00000234089
ENSG00000234104
ENSG00000234105
ENSG00000234111
ENSG00000234116
ENSG00000234139
ENSG00000234142
ENSG00000234148
ENSG00000234155
ENSG00000234162
ENSG00000234165
ENSG00000234169
ENSG00000234170
ENSG00000234172
ENSG00000234182
ENSG00000234190
ENSG00000234191
ENSG00000234199
ENSG00000234207
ENSG00000234215
ENSG00000234223
ENSG00000234225
ENSG00000234238
ENSG00000234244
ENSG00000234265
ENSG00000234277
ENSG00000234283
ENSG00000234292
ENSG00000234296
ENSG00000234306
ENSG00000234308
ENSG00000234318
ENSG00000234350
ENSG00000234362
ENSG00000234384
ENSG00000234387
ENSG00000234394
ENSG00000234418
ENSG00000234432
ENSG00000234446
ENSG00000234449
ENSG00000234455
ENSG00000234464
ENSG00000234471
ENSG00000234474
ENSG00000234503
ENSG00000234506
ENSG00000234535
ENSG00000234540
ENSG00000234542
ENSG00000234546
ENSG00000234548
ENSG00000234551
ENSG00000234571
ENSG00000234572
ENSG00000234580
ENSG00000234593
ENSG00000234597
ENSG00000234608
ENSG00000234613
ENSG00000234622
ENSG00000234630
ENSG00000234634
ENSG00000234640
ENSG00000234647
ENSG00000234660
ENSG00000234665
ENSG00000234675
ENSG00000234686
ENSG00000234689
ENSG00000234692
ENSG00000234698
ENSG00000234703
ENSG00000234710
ENSG00000234717
ENSG00000234722
ENSG00000234730
ENSG00000234754
ENSG00000234756
ENSG00000234763
ENSG00000234767
ENSG00000234768
ENSG00000234781
ENSG00000234787
ENSG00000234826
ENSG00000234860
ENSG00000234862
ENSG00000234864
ENSG00000234877
ENSG00000234880
ENSG00000234891
ENSG00000234902
ENSG00000234917
ENSG00000234918
ENSG00000234919
ENSG00000234928
ENSG00000234929
ENSG00000234938
ENSG00000234940
ENSG00000234944
ENSG00000234952
ENSG00000234962
ENSG00000234967
ENSG00000234973
ENSG00000234977
ENSG00000234986
ENSG00000234988
ENSG00000235007
ENSG00000235009
ENSG00000235011
ENSG00000235038
ENSG00000235049
ENSG00000235054
ENSG00000235059
ENSG00000235070
ENSG00000235091
ENSG00000235097
ENSG00000235099
ENSG00000235100
ENSG00000235126
ENSG00000235127
ENSG00000235139
ENSG00000235142
ENSG00000235146
ENSG00000235149
ENSG00000235152
ENSG00000235160
ENSG00000235166
ENSG00000235168
ENSG00000235172
ENSG00000235180
ENSG00000235192
ENSG00000235200
ENSG00000235201
ENSG00000235202
ENSG00000235209
ENSG00000235215
ENSG00000235221
ENSG00000235242
ENSG00000235244
ENSG00000235263
ENSG00000235271
ENSG00000235293
ENSG00000235304
ENSG00000235314
ENSG00000235319
ENSG00000235337
ENSG00000235343
ENSG00000235356
ENSG00000235366
ENSG00000235385
ENSG00000235412
ENSG00000235415
ENSG00000235446
ENSG00000235450
ENSG00000235475
ENSG00000235491
ENSG00000235494
ENSG00000235518
ENSG00000235519
ENSG00000235523
ENSG00000235532
ENSG00000235533
ENSG00000235537
ENSG00000235564
ENSG00000235570
ENSG00000235572
ENSG00000235576
ENSG00000235578
ENSG00000235584
ENSG00000235597
ENSG00000235610
ENSG00000235612
ENSG00000235615
ENSG00000235621
ENSG00000235625
ENSG00000235643
ENSG00000235659
ENSG00000235660
ENSG00000235728
ENSG00000235736
ENSG00000235741
ENSG00000235743
ENSG00000235774
ENSG00000235806
ENSG00000235813
ENSG00000235815
ENSG00000235819
ENSG00000235822
ENSG00000235824
ENSG00000235830
ENSG00000235858
ENSG00000235881
ENSG00000235884
ENSG00000235885
ENSG00000235886
ENSG00000235887
ENSG00000235911
ENSG00000235933
ENSG00000235965
ENSG00000235979
ENSG00000235997
ENSG00000236008
ENSG00000236009
ENSG00000236013
ENSG00000236022
ENSG00000236028
ENSG00000236030
ENSG00000236036
ENSG00000236046
ENSG00000236049
ENSG00000236052
ENSG00000236053
ENSG00000236069
ENSG00000236076
ENSG00000236078
ENSG00000236081
ENSG00000236094
ENSG00000236098
ENSG00000236102
ENSG00000236106
ENSG00000236109
ENSG00000236117
ENSG00000236120
ENSG00000236129
ENSG00000236133
ENSG00000236140
ENSG00000236141
ENSG00000236145
ENSG00000236151
ENSG00000236162
ENSG00000236164
ENSG00000236172
ENSG00000236173
ENSG00000236176
ENSG00000236193
ENSG00000236206
ENSG00000236209
ENSG00000236212
ENSG00000236231
ENSG00000236255
ENSG00000236268
ENSG00000236303
ENSG00000236335
ENSG00000236347
ENSG00000236354
ENSG00000236356
ENSG00000236372
ENSG00000236373
ENSG00000236376
ENSG00000236377
ENSG00000236384
ENSG00000236385
ENSG00000236387
ENSG00000236389
ENSG00000236392
ENSG00000236393
ENSG00000236403
ENSG00000236414
ENSG00000236423
ENSG00000236436
ENSG00000236464
ENSG00000236481
ENSG00000236485
ENSG00000236494
ENSG00000236497
ENSG00000236507
ENSG00000236513
ENSG00000236532
ENSG00000236601
ENSG00000236605
ENSG00000236611
ENSG00000236634
ENSG00000236648
ENSG00000236687
ENSG00000236714
ENSG00000236719
ENSG00000236720
ENSG00000236740
ENSG00000236743
ENSG00000236747
ENSG00000236751
ENSG00000236760
ENSG00000236769
ENSG00000236780
ENSG00000236799
ENSG00000236800
ENSG00000236819
ENSG00000236834
ENSG00000236839
ENSG00000236849
ENSG00000236854
ENSG00000236871
ENSG00000236874
ENSG00000236885
ENSG00000236889
ENSG00000236892
ENSG00000236897
ENSG00000236908
ENSG00000236920
ENSG00000236947
ENSG00000236950
ENSG00000236951
ENSG00000236961
ENSG00000236963
ENSG00000236968
ENSG00000236975
ENSG00000236985
ENSG00000236989
ENSG00000237002
ENSG00000237011
ENSG00000237013
ENSG00000237019
ENSG00000237021
ENSG00000237035
ENSG00000237048
ENSG00000237057
ENSG00000237062
ENSG00000237063
ENSG00000237069
ENSG00000237074
ENSG00000237087
ENSG00000237092
ENSG00000237094
ENSG00000237153
ENSG00000237167
ENSG00000237179
ENSG00000237189
ENSG00000237208
ENSG00000237220
ENSG00000237222
ENSG00000237248
ENSG00000237262
ENSG00000237266
ENSG00000237271
ENSG00000237283
ENSG00000237290
ENSG00000237292
ENSG00000237310
ENSG00000237320
ENSG00000237326
ENSG00000237339
ENSG00000237342
ENSG00000237343
ENSG00000237346
ENSG00000237357
ENSG00000237359
ENSG00000237377
ENSG00000237378
ENSG00000237389
ENSG00000237401
ENSG00000237407
ENSG00000237414
ENSG00000237419
ENSG00000237423
ENSG00000237445
ENSG00000237460
ENSG00000237461
ENSG00000237473
ENSG00000237491
ENSG00000237494
ENSG00000237498
ENSG00000237513
ENSG00000237523
ENSG00000237525
ENSG00000237527
ENSG00000237530
ENSG00000237531
ENSG00000237532
ENSG00000237534
ENSG00000237552
ENSG00000237560
ENSG00000237563
ENSG00000237567
ENSG00000237571
ENSG00000237574
ENSG00000237579
ENSG00000237585
ENSG00000237588
ENSG00000237595
ENSG00000237609
ENSG00000237612
ENSG00000237613
ENSG00000237626
ENSG00000237638
ENSG00000237643
ENSG00000237664
ENSG00000237670
ENSG00000237687
ENSG00000237689
ENSG00000237699
ENSG00000237713
ENSG00000237716
ENSG00000237735
ENSG00000237751
ENSG00000237753
ENSG00000237756
ENSG00000237759
ENSG00000237761
ENSG00000237764
ENSG00000237772
ENSG00000237807
ENSG00000237837
ENSG00000237845
ENSG00000237856
ENSG00000237864
ENSG00000237874
ENSG00000237877
ENSG00000237879
ENSG00000237880
ENSG00000237899
ENSG00000237921
ENSG00000237927
ENSG00000237940
ENSG00000237947
ENSG00000237949
ENSG00000237954
ENSG00000237980
ENSG00000237987
ENSG00000237992
ENSG00000238004
ENSG00000238009
ENSG00000238031
ENSG00000238034
ENSG00000238035
ENSG00000238054
ENSG00000238062
ENSG00000238063
ENSG00000238097
ENSG00000238099
ENSG00000238102
ENSG00000238107
ENSG00000238122
ENSG00000238124
ENSG00000238129
ENSG00000238131
ENSG00000238171
ENSG00000238176
ENSG00000238192
ENSG00000238195
ENSG00000238198
ENSG00000238212
ENSG00000238217
ENSG00000238230
ENSG00000238242
ENSG00000238265
ENSG00000238266
ENSG00000238270
ENSG00000238277
ENSG00000238284
ENSG00000238291
ENSG00000238358
ENSG00000238837
ENSG00000239205
ENSG00000239216
ENSG00000239225
ENSG00000239407
ENSG00000239440
ENSG00000239454
ENSG00000239467
ENSG00000239498
ENSG00000239589
ENSG00000239661
ENSG00000239674
ENSG00000239715
ENSG00000239739
ENSG00000239767
ENSG00000239774
ENSG00000239828
ENSG00000239921
ENSG00000239922
ENSG00000239945
ENSG00000239991
ENSG00000240006
ENSG00000240033
ENSG00000240095
ENSG00000240152
ENSG00000240350
ENSG00000240354
ENSG00000240355
ENSG00000240423
ENSG00000240440
ENSG00000240450
ENSG00000240476
ENSG00000240497
ENSG00000240562
ENSG00000240567
ENSG00000240573
ENSG00000240687
ENSG00000240707
ENSG00000240708
ENSG00000240770
ENSG00000240777
ENSG00000240792
ENSG00000240859
ENSG00000240893
ENSG00000240895
ENSG00000240973
ENSG00000240996
ENSG00000241042
ENSG00000241048
ENSG00000241084
ENSG00000241098
ENSG00000241131
ENSG00000241151
ENSG00000241169
ENSG00000241180
ENSG00000241213
ENSG00000241219
ENSG00000241220
ENSG00000241295
ENSG00000241316
ENSG00000241317
ENSG00000241324
ENSG00000241336
ENSG00000241369
ENSG00000241383
ENSG00000241449
ENSG00000241475
ENSG00000241593
ENSG00000241599
ENSG00000241636
ENSG00000241657
ENSG00000241667
ENSG00000241669
ENSG00000241696
ENSG00000241743
ENSG00000241754
ENSG00000241767
ENSG00000241792
ENSG00000241832
ENSG00000241881
ENSG00000241882
ENSG00000241884
ENSG00000241912
ENSG00000241933
ENSG00000242009
ENSG00000242012
ENSG00000242021
ENSG00000242042
ENSG00000242072
ENSG00000242086
ENSG00000242145
ENSG00000242147
ENSG00000242258
ENSG00000242282
ENSG00000242317
ENSG00000242339
ENSG00000242375
ENSG00000242440
ENSG00000242474
ENSG00000242512
ENSG00000242516
ENSG00000242536
ENSG00000242545
ENSG00000242553
ENSG00000242568
ENSG00000242618
ENSG00000242659
ENSG00000242741
ENSG00000242753
ENSG00000242767
ENSG00000242775
ENSG00000242781
ENSG00000242791
ENSG00000242816
ENSG00000242828
ENSG00000243012
ENSG00000243062
ENSG00000243081
ENSG00000243083
ENSG00000243089
ENSG00000243149
ENSG00000243179
ENSG00000243295
ENSG00000243296
ENSG00000243300
ENSG00000243321
ENSG00000243345
ENSG00000243347
ENSG00000243485
ENSG00000243486
ENSG00000243491
ENSG00000243550
ENSG00000243572
ENSG00000243574
ENSG00000243583
ENSG00000243593
ENSG00000243636
ENSG00000243694
ENSG00000243701
ENSG00000243733
ENSG00000243795
ENSG00000243819
ENSG00000243832
ENSG00000243861
ENSG00000243885
ENSG00000243903
ENSG00000243953
ENSG00000243961
ENSG00000243969
ENSG00000244063
ENSG00000244247
ENSG00000244278
ENSG00000244321
ENSG00000244337
ENSG00000244342
ENSG00000244345
ENSG00000244358
ENSG00000244382
ENSG00000244459
ENSG00000244461
ENSG00000244464
ENSG00000244471
ENSG00000244541
ENSG00000244545
ENSG00000244564
ENSG00000244620
ENSG00000244706
ENSG00000244733
ENSG00000244952
ENSG00000244953
ENSG00000245060
ENSG00000245149
ENSG00000245164
ENSG00000245330
ENSG00000245468
ENSG00000245522
ENSG00000245651
ENSG00000245662
ENSG00000245685
ENSG00000245719
ENSG00000245729
ENSG00000245750
ENSG00000245870
ENSG00000245954
ENSG00000245975
ENSG00000246100
ENSG00000246145
ENSG00000246211
ENSG00000246331
ENSG00000246363
ENSG00000246394
ENSG00000246430
ENSG00000246465
ENSG00000246541
ENSG00000246640
ENSG00000246774
ENSG00000246777
ENSG00000246820
ENSG00000246863
ENSG00000246876
ENSG00000246898
ENSG00000247011
ENSG00000247134
ENSG00000247157
ENSG00000247317
ENSG00000247373
ENSG00000247516
ENSG00000247765
ENSG00000247810
ENSG00000247877
ENSG00000247970
ENSG00000247982
ENSG00000248029
ENSG00000248100
ENSG00000248103
ENSG00000248107
ENSG00000248112
ENSG00000248118
ENSG00000248125
ENSG00000248127
ENSG00000248131
ENSG00000248132
ENSG00000248137
ENSG00000248143
ENSG00000248145
ENSG00000248148
ENSG00000248184
ENSG00000248187
ENSG00000248195
ENSG00000248197
ENSG00000248199
ENSG00000248202
[truncated: 2,553 more rows]
